# Supplementary material
Source: publisher site journal article supplement (https://www.spandidos-publications.com/4816/downloadSupplementary)
Supplement: Supplementary file 1 [file downloadSupplementary]

## Sheet: Table SIII
Table SIII. Univariate Cox regression analysis.
Gene name	HR	B	se	HR.95L	HR.95H	P-value
ALDH3A2	0.655215	-0.422792	0.203296	0.439883	0.975956	0.0375548
ALOX5	0.591892	-0.524431	0.180122	0.415837	0.842485	0.00359656
CA9	1.43185	0.358966	0.0988239	1.17972	1.73787	0.000280816
CD44	0.679946	-0.385743	0.178599	0.479127	0.964934	0.0307859
CDKN1A	1.45118	0.372377	0.146526	1.08892	1.93395	0.011042
CP	1.11658	0.110267	0.0524979	1.0074	1.23758	0.0356934
DBN1	2.42732	0.88679	0.183829	1.69298	3.4802	1.40721e-06
AKR1C1	1.27361	0.241859	0.104941	1.03684	1.56446	0.021183
DDIT3	1.83174	0.605268	0.241966	1.13999	2.94325	0.0123684
TSC22D3	0.682202	-0.38243	0.192866	0.46746	0.995591	0.0473813
ACSL1	1.38202	0.323544	0.129458	1.07231	1.78118	0.0124464
FLT3	0.793651	-0.231112	0.0897526	0.665628	0.946296	0.0100243
G6PD	1.54523	0.435174	0.117205	1.22809	1.94428	0.000204866
HIF1A	2.03306	0.709543	0.204445	1.36184	3.03511	0.000519322
HMGCR	1.54638	0.435918	0.220564	1.00363	2.38266	0.0481123
HES1	1.55251	0.439871	0.197785	1.05361	2.28764	0.0261491
HSBP1	1.72016	0.542418	0.248063	1.05783	2.79718	0.0287709
HSPB1	1.30197	0.263879	0.115657	1.0379	1.63324	0.0225153
IFNG	0.771155	-0.259866	0.0894662	0.647124	0.918957	0.00367685
LAMP2	1.75472	0.562311	0.276625	1.02034	3.01767	0.0420769
LOX	1.27163	0.240296	0.101211	1.04282	1.55064	0.0175871
MAFG	1.60846	0.475278	0.163031	1.16853	2.21403	0.00355392
MAP3K5	1.46947	0.3849	0.180054	1.03252	2.09133	0.0325416
MYB	0.741457	-0.299139	0.0830821	0.630037	0.87258	0.000317582
SLC11A2	2.12716	0.754788	0.323605	1.1281	4.01101	0.0196777
PCBP1	0.384962	-0.954611	0.372214	0.185604	0.798449	0.010327
PHKG2	0.577615	-0.548847	0.192417	0.396144	0.842217	0.0043392
RRM2	1.23935	0.21459	0.108958	1.00104	1.53441	0.0488982
SCP2	0.495195	-0.702803	0.320204	0.264374	0.927544	0.0281736
SLC1A4	0.71253	-0.338933	0.155701	0.525134	0.9668	0.0294945
SLC2A1	1.48175	0.393223	0.128676	1.15145	1.90679	0.0022438
SQLE	1.28912	0.253959	0.112583	1.03386	1.6074	0.0240865
STAT3	0.439454	-0.822221	0.346903	0.222653	0.867358	0.0177797
AURKA	1.38647	0.326757	0.113198	1.11059	1.73086	0.00389427
TGFBR1	1.41426	0.346606	0.146914	1.06041	1.88618	0.0183124
VEGFA	1.36285	0.309576	0.151925	1.01188	1.83555	0.0415811
YWHAE	0.515992	-0.661664	0.2047	0.345464	0.770697	0.00122772
SLC7A5	1.27339	0.241682	0.0928772	1.06146	1.52763	0.00926358
ULK1	2.08474	0.734644	0.249657	1.27804	3.40064	0.00325456
PRC1	1.27171	0.240361	0.104773	1.03563	1.5616	0.0217844
LONP1	1.93997	0.66267	0.279958	1.12071	3.35811	0.0179313
FADS2	1.2135	0.193513	0.0954015	1.00655	1.46301	0.0425192
ATG5	1.85384	0.617257	0.192711	1.27068	2.70462	0.00135994
EMC2	1.63161	0.489565	0.221091	1.05785	2.51657	0.0268073
KEAP1	0.575387	-0.552713	0.273493	0.336637	0.983461	0.0432858
ST6GALNAC2	0.829597	-0.186815	0.081332	0.707355	0.972965	0.0216221
TXNIP	0.70639	-0.347587	0.145909	0.530698	0.940248	0.0172083
BRD4	2.77388	1.02025	0.386755	1.29981	5.91962	0.00834063
ISCU	0.568333	-0.565048	0.278865	0.329028	0.981687	0.0427401
PANX1	2.03149	0.708769	0.233479	1.28551	3.21035	0.00239991
WIPI2	2.46489	0.902147	0.427993	1.06534	5.70303	0.0350433
HILPDA	1.45586	0.375595	0.147437	1.09049	1.94365	0.0108501
PSAT1	1.15921	0.147738	0.0687528	1.01307	1.32643	0.0316483
ACSL5	0.741883	-0.298563	0.129835	0.575202	0.956866	0.0214728
YY1AP1	0.462354	-0.771424	0.291494	0.261129	0.818644	0.00813415
CISD1	1.61154	0.47719	0.179605	1.13334	2.29151	0.00788656
TRIB3	1.25064	0.223656	0.101828	1.02437	1.52689	0.0280628
PERP	1.41156	0.344699	0.165695	1.02014	1.95317	0.0374957
LINC00472	0.696733	-0.361353	0.0772237	0.598871	0.810587	2.87859e-06
IL33	0.880537	-0.127224	0.0602336	0.782486	0.990874	0.0346717
MTDH	1.80287	0.589378	0.235543	1.13624	2.86061	0.0123423
SRXN1	1.65588	0.504331	0.20786	1.10179	2.48862	0.0152536
